# Supplementary material
Source: publisher figshare collection journal article supplement (https://frontiersin.figshare.com/ndownloader/files/24714590)

**Supplementary Figure 1.** Local skin reaction following successful intraosseous blood administration, without any negative long-term consequences. Note the puncture site at the anterior aspect of the tibia rather than at the antero-medial surface of the tibia.

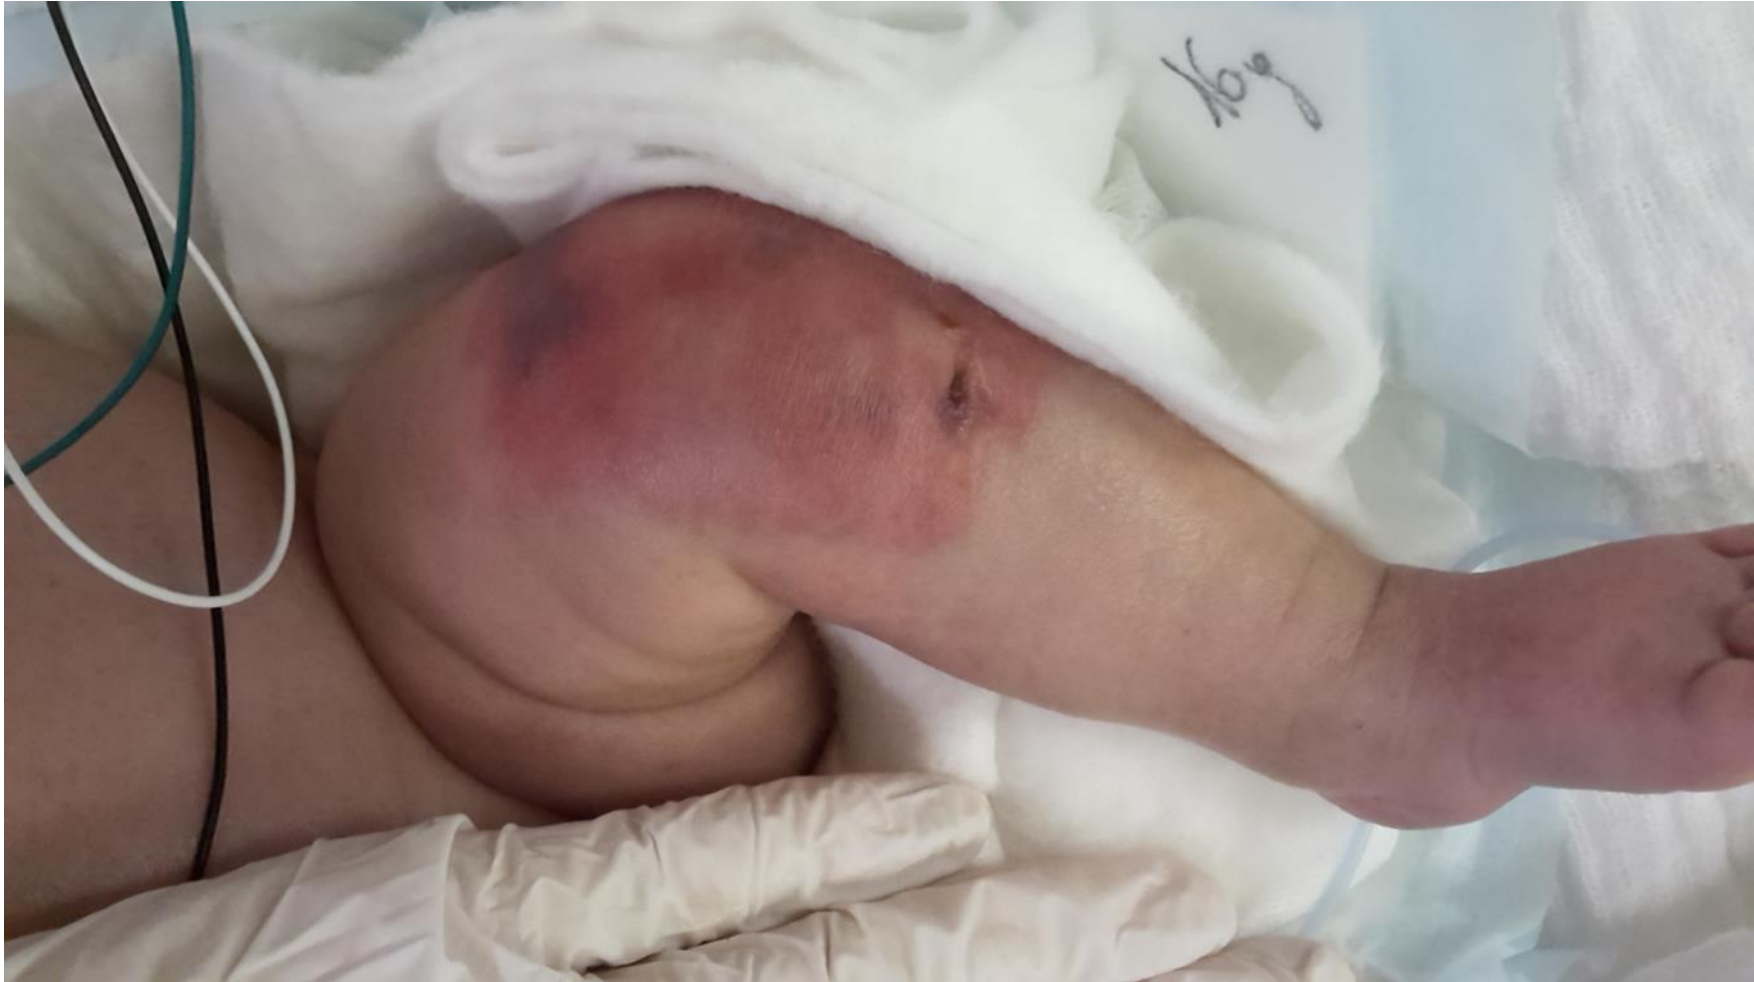

Supplement: Supplementary file [file 24714590]
